# Supplementary material for: Evolutionary Toggling of Vpx/Vpr Specificity Results in Divergent Recognition of the Restriction Factor SAMHD1
Source: PubMed Central journal article supplement (PMC3715410; doi:10.1371/journal.ppat.1003496), 2013-07-18
Supplement: ppat.1003496.s002.pdf [file ppat.1003496.s002.pdf]

Figure S2

N-terminus

|            |            |            |             |            |            |            |     |
|------------|------------|------------|-------------|------------|------------|------------|-----|
| Hu SAMHD1  | MQRADSEQPS | KRPRCDDSPR | TPSNTPSAEA  | DWSPGLELHP | DYKTWGPEQV | CSFLRRGGFE | 60  |
| Rhe SAMHD1 | --Q---D--- | ----F----- | -----S----- | -C-----    | -----      | -F-----G   |     |
| Mnd SAMHD1 | --Q---D--- | ----F----- | ---S-----   | -C---V---- | -----      | -F-----G   |     |
| RCM SAMHD1 | --Q---D--- | ----F----- | ---S-----   | -C-----    | -----      | -F-----G   |     |
| AGM SAMHD1 | --Q---D--- | --L-F----- | ---S-----   | -----      | -----D---- | -F-----G   |     |
| Deb SAMHD1 | --Q---D--- | ----F----- | ---S-----   | -G-----    | -----D---- | -F-----G   |     |
|            |            |            |             |            |            |            |     |
| Hu SAMHD1  | EPVLLKNIRE | NEITGALLPC | LDESRFENLG  | VSSLGERKKL | LSYIQRLVQI | HVDTMKVIND | 120 |
| Rhe SAMHD1 | --A-----   | -K-----    | ----H-----  | -----      | -----SG--  | -----      |     |
| Mnd SAMHD1 | --A-----   | -K-----    | ----H-----  | -----      | -----SG--  | -----      |     |
| RCM SAMHD1 | --A-----   | -K--D----- | ----H-----  | -----      | -----SG--  | -----      |     |
| AGM SAMHD1 | --A-----Q- | -K-----    | ----H-----  | -----      | -----G--   | -----      |     |
| Deb SAMHD1 | --A-----   | -K-----    | ----H-----  | -----      | -----G--   | -----      |     |

C-terminus

|            |            |            |            |        |     |
|------------|------------|------------|------------|--------|-----|
| Hu SAMHD1  | ITPQKKEWND | STSVQNPTRL | REASKSRVQL | FKDDPM | 626 |
| Rhe SAMHD1 | -----Y     | R---S---   | -----L--   | -----K |     |
| Mnd SAMHD1 | -----Y     | R---S---   | -----L--   | -----K |     |
| RCM SAMHD1 | -----Y     | R---S---   | -----L--   | -----K |     |
| AGM SAMHD1 | -----Y     | R---S---   | -----L--   | -----K |     |
| Deb SAMHD1 | -----Y     | R---S---   | -----L--   | -----K |     |
