# Supplementary material for: Evolutionary Toggling of Vpx/Vpr Specificity Results in Divergent Recognition of the Restriction Factor SAMHD1
Source: PubMed Central journal article supplement (PMC3715410; doi:10.1371/journal.ppat.1003496), 2013-07-18

**Figure S3**

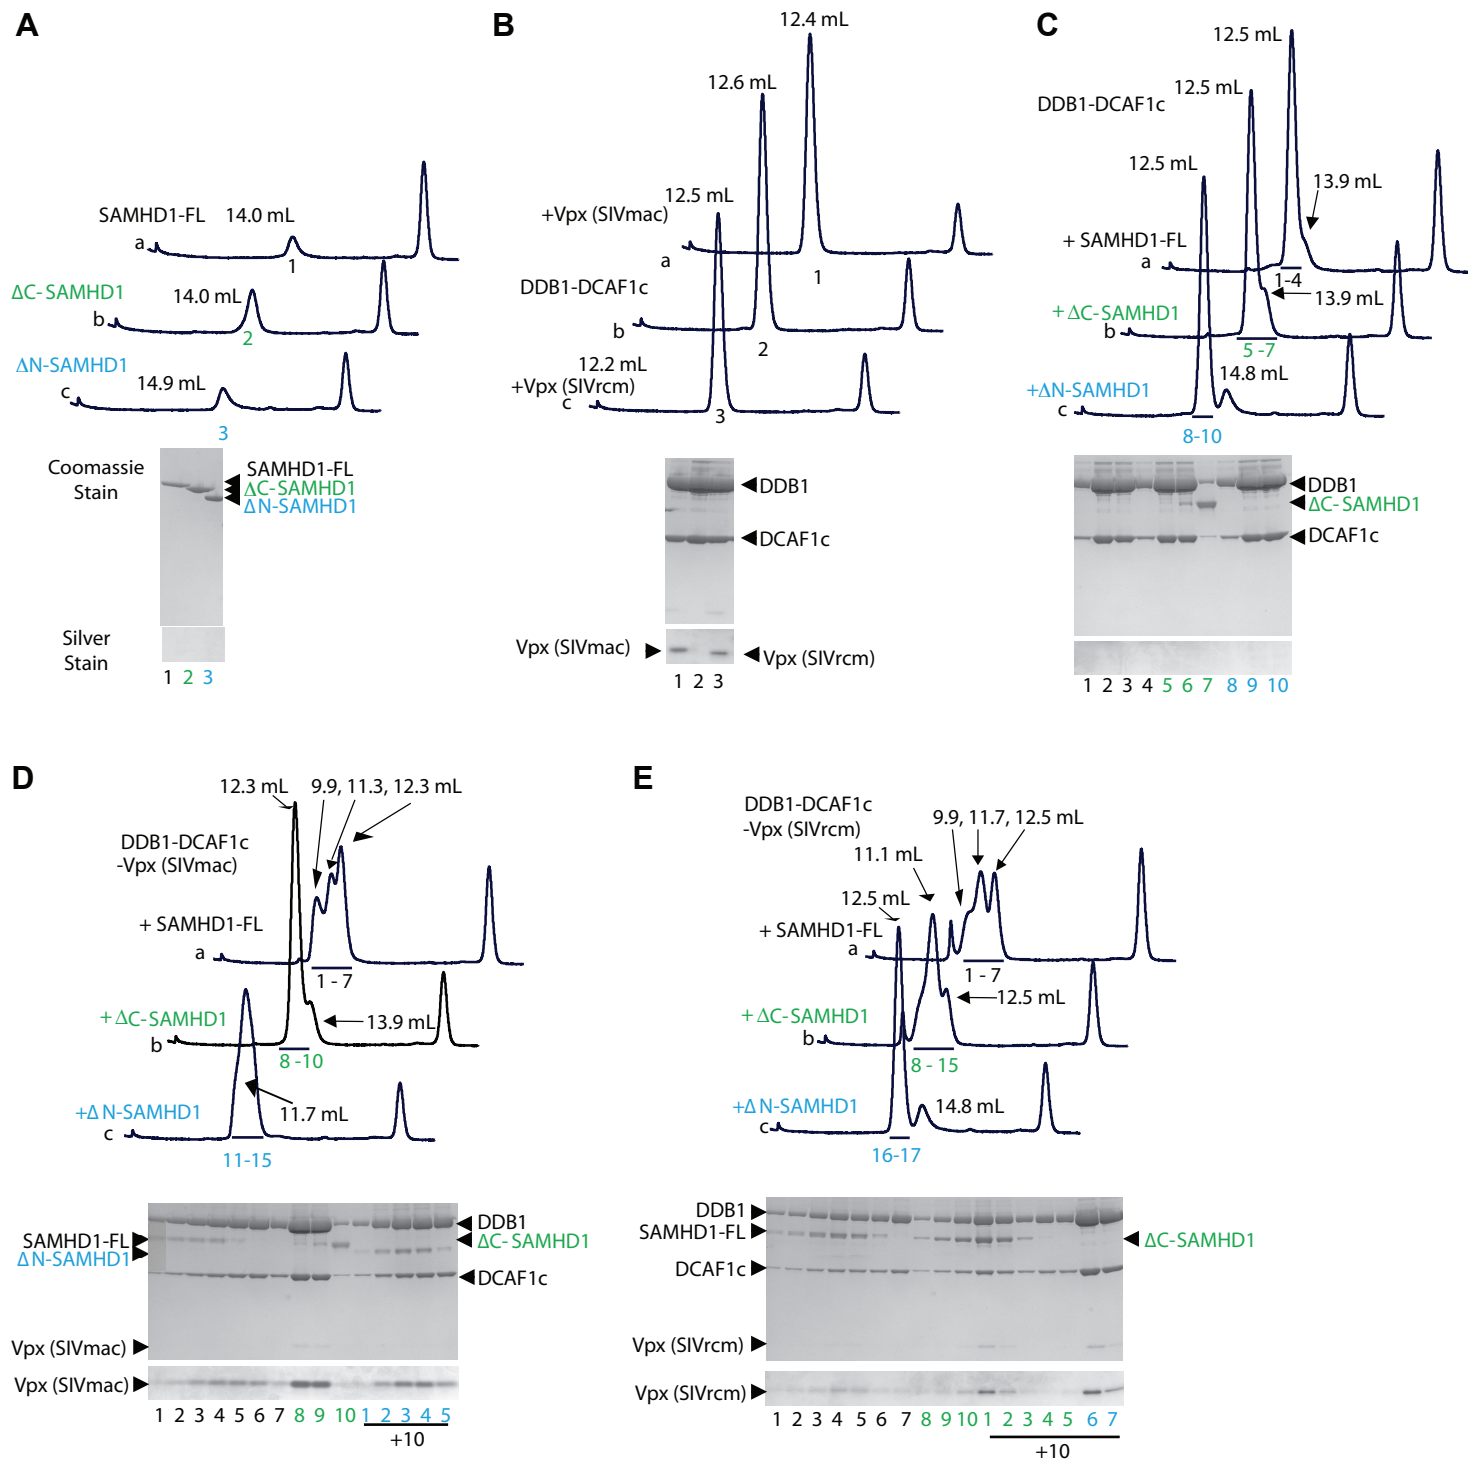

Supplement: ppat.1003496.s003.pdf [file ppat.1003496.s003.pdf]
